# Supplementary material
Source: Springer Nature journal article supplement (https://www.springermedizin.de/resource/supplementary/12879_2012_2154_MOESM1_ESM.pdf/9443816)
Supplement: MOESM1 [file 9443816]

Sensitivity and specificity of DFA vs PCR

**HAdV** DFA vs. PCR (n=434)

|              | PCR POSITIVE | PCR NEGATIVE |
|--------------|--------------|--------------|
| DFA Positive | 8            | 0            |
| DFA Negative | 79           | 347          |

Sensitivity: 9.1%  
 Specificity: 100.0%  
 PPV: 100.0%  
 NPV: 81.4%

**FLUAV** DFA vs. PCR (n=435)

|              | PCR POSITIVE | PCR NEGATIVE |
|--------------|--------------|--------------|
| DFA Positive | 2            | 0            |
| DFA Negative | 13           | 420          |

Sensitivity: 13.3%  
 Specificity: 100.0%  
 PPV: 100.0%  
 NPV: 96.9%

**FLUBV** DFA vs. PCR (n=435)

|              | PCR POSITIVE | PCR NEGATIVE |
|--------------|--------------|--------------|
| DFA Positive | 0            | 0            |
| DFA Negative | 4            | 431          |

Sensitivity: 0.0%  
 Specificity: 100.0%  
 PPV: NaN  
 NPV: 99.0%

**HPIV-1** DFA vs. PCR (n=435)

|              | PCR POSITIVE | PCR NEGATIVE |
|--------------|--------------|--------------|
| DFA Positive | 4            | 0            |
| DFA Negative | 26           | 405          |

Sensitivity: 13.3%  
 Specificity: 100.0%  
 PPV: 100.0%  
 NPV: 93.9%

**HPIV-2** DFA vs. PCR (n=435)

|              | PCR POSITIVE | PCR NEGATIVE |
|--------------|--------------|--------------|
| DFA Positive | 0            | 0            |
| DFA Negative | 12           | 423          |

Sensitivity: 0.0%  
Specificity: 100.0%  
PPV: NaN  
NPV: 97.0%

**HPIV-3** DFA vs. PCR (n=434)

|              | PCR POSITIVE | PCR NEGATIVE |
|--------------|--------------|--------------|
| DFA Positive | 7            | 1            |
| DFA Negative | 31           | 395          |

Sensitivity: 18.0%  
Specificity: 99.0%  
PPV: 87.5%  
NPV: 92.7%

**RSV** DFA vs. PCR (n=427)

|              | PCR POSITIVE | PCR NEGATIVE |
|--------------|--------------|--------------|
| DFA Positive | 74           | 1            |
| DFA Negative | 21           | 330          |

Sensitivity: 77.8%  
Specificity: 99.6%  
PPV: 98.6%  
NPV: 94.0%
